# Supplementary material
Source: PubMed Central journal article supplement (PMC5030692)

A)

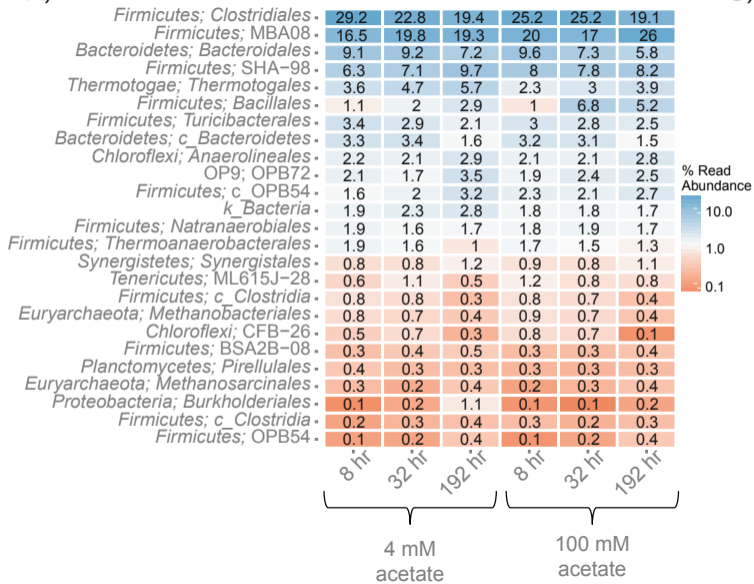

B)

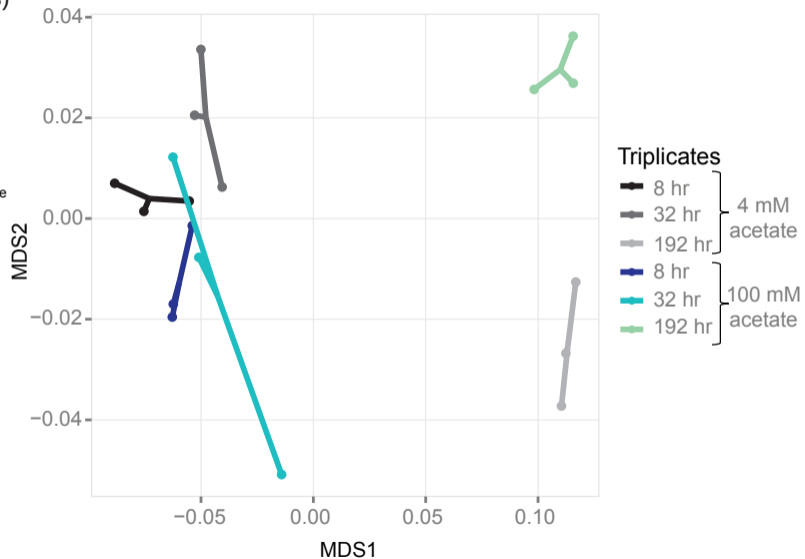

Supplement: ismej201639x2.pdf [file ismej201639x2.pdf]
